# Supplementary material
Source: PubMed Central journal article supplement (PMC4363265)

# Supplemental Material

Supplemental Table 1: Baseline characteristics of dabigatran and rivaroxaban patients with their matched warfarin control

|                          | Warfarin | Dabigatran | Warfarin | Rivaroxaban |
|--------------------------|----------|------------|----------|-------------|
| n                        | 448      | 224        | 412      | 206         |
| age (years)              | 69.7     | 68.5       | 68.6     | 67.1        |
| gender (%male)           | 56.5     | 56.5       | 59.3     | 59.3        |
| Caucasian (%)            | 83.5     | 83.5       | 74.6     | 74.6        |
| diabetic (%)             | 74.1     | 74.1       | 68.9     | 68.9        |
| time on HD (years)       | 2.3      | 2.1        | 2.2      | 2.3         |
| catheter (%)             | 31.7     | 31.7       | 20.0     | 20.0        |
| systolic BP (mmHg)       | 130      | 129        | 134      | 136         |
| diastolic BP (mmHg)      | 68       | 67         | 70       | 69          |
| albumin (g/dL)           | 3.6      | 3.6        | 3.6      | 3.6         |
| hemoglobin (g/dL)        | 10.7     | 10.8       | 10.6     | 10.4        |
| thrombocytopenia (%)     | 0        | 0          | 0        | 0           |
| Epogen (units per HD)    | 6082     | 6908       | 4975     | 5271        |
| heparin (units per HD)   | 3624     | 4076       | 3247     | 3570        |
| aspirin (%)              | 2.2      | 2.2        | 2.4      | 2.4         |
| Charlson score           | 5.4      | 5.5        | 5.3      | 5.6         |
| CHADS <sub>2</sub> score | 2.3      | 2.3        | 2.2      | 2.2         |
| bleeding index score     | 1.8      | 1.8        | 1.7      | 1.7         |
| minor bleed* (%)         | 3.0      | 3.0        | 3.0      | 3.0         |
| major bleed* (%)         | 3.0      | 3.0        | 3.0      | 3.0         |

HD hemodialysis; BP blood pressure

\*occurring in the previous 30 days

Supplemental Figure 1: Point prevalence (95% confidence interval) of dabigatran and rivaroxaban among anticoagulated chronic hemodialysis patients with atrial fibrillation

Supplemental Figure 2: Point prevalence (95% confidence interval) of dabigatran among anticoagulated chronic hemodialysis patients with atrial fibrillation, by drug dose

Supplemental Figure 3: Point prevalence (95% confidence interval) of rivaroxaban among anticoagulated chronic hemodialysis patients with atrial fibrillation, by drug dose

Supplemental Figure 1

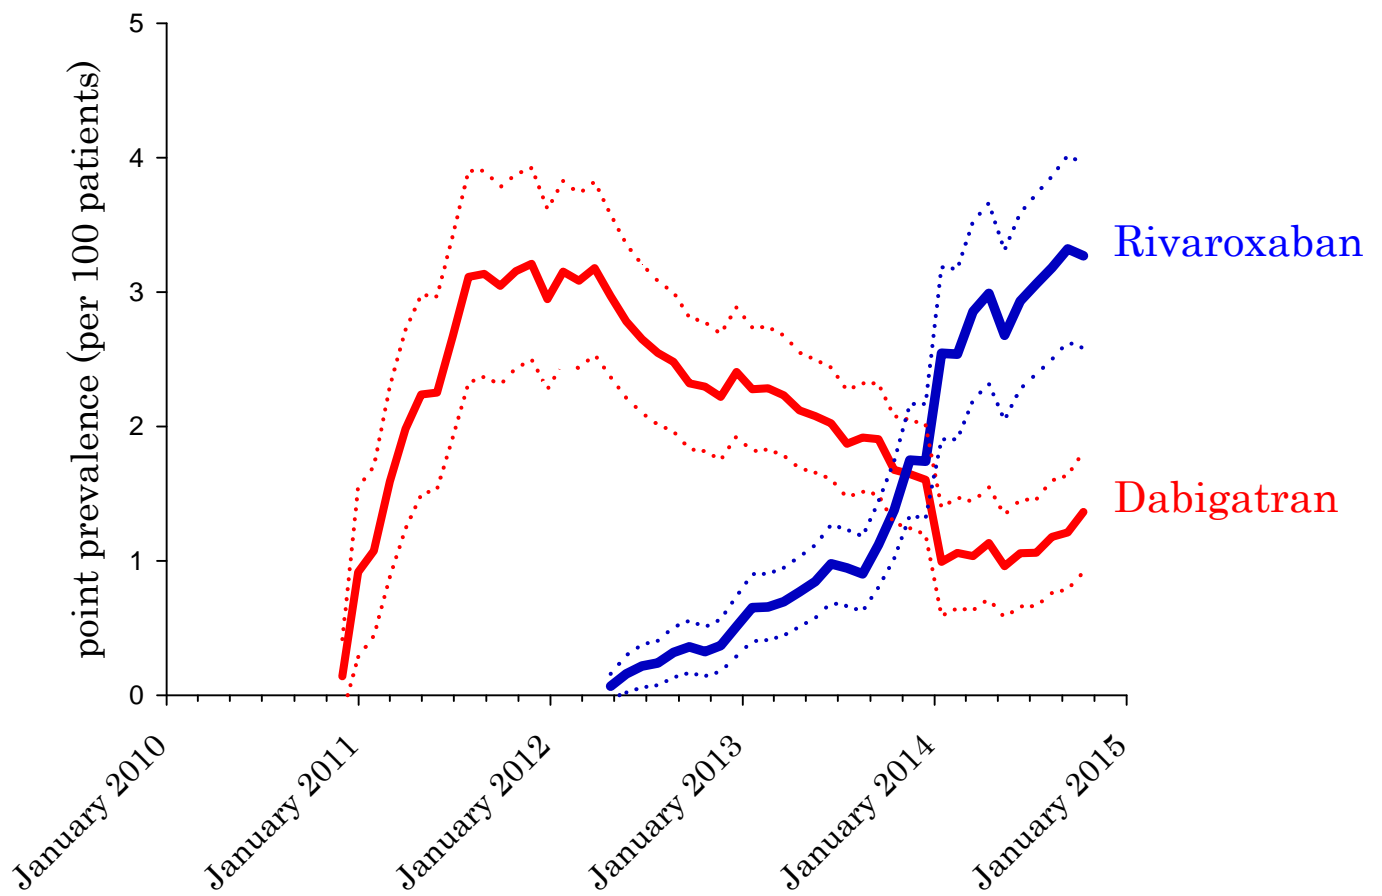

**Supplemental Figure 2**

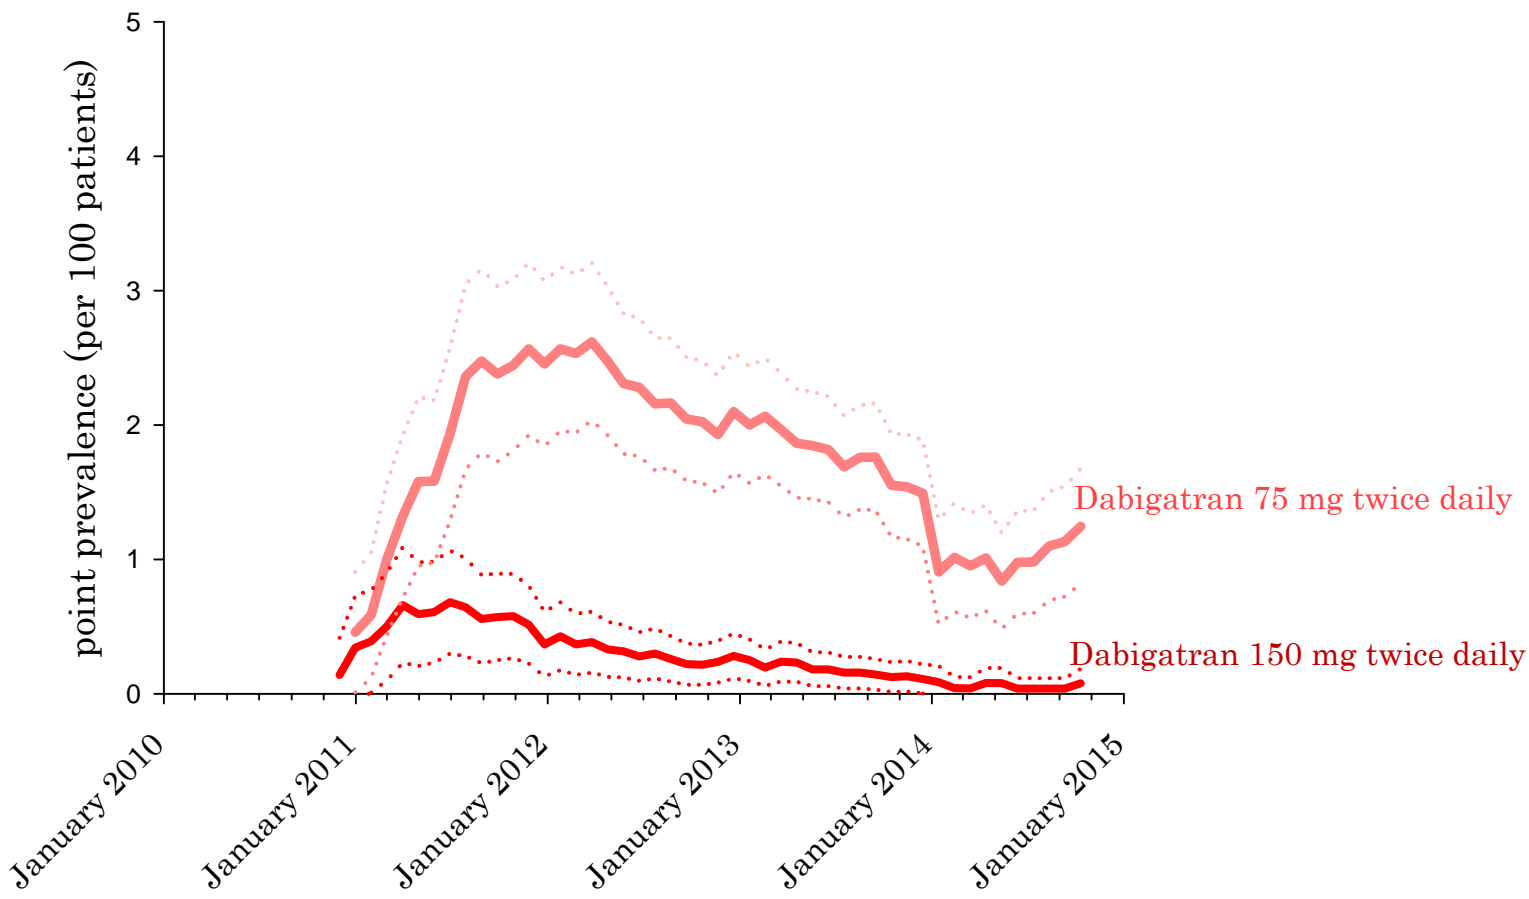

Supplemental Figure 3

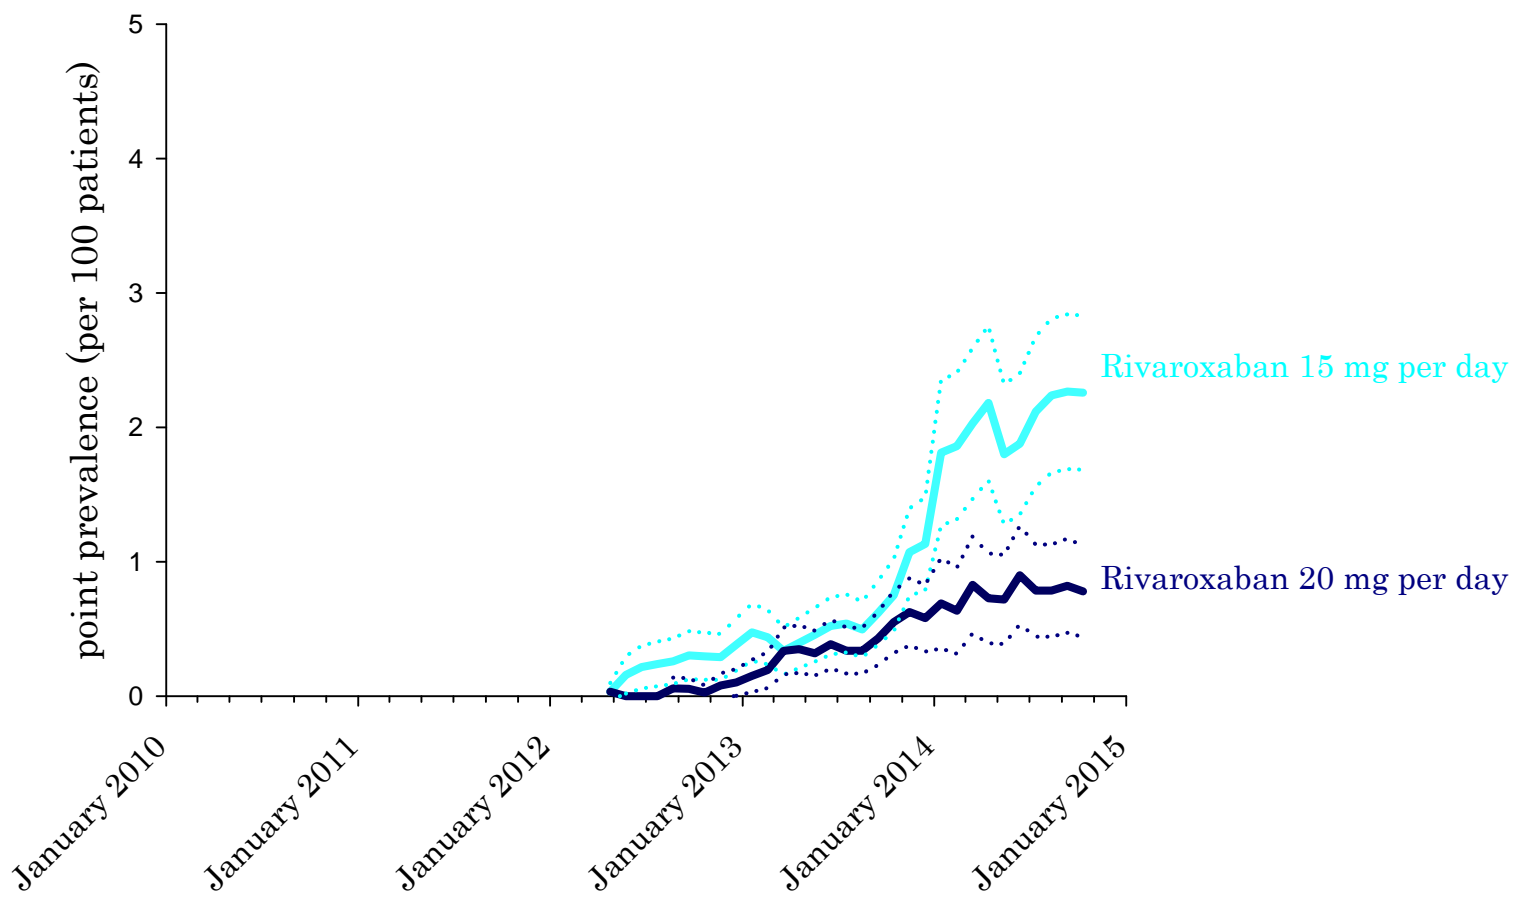

Supplement: NIHMS656716-supplement-1.pdf [file NIHMS656716-supplement-1.pdf]
